# Supplementary material
Source: bioRxiv or medRxiv preprint supplement (https://www.biorxiv.org/highwire/filestream/121706/field_highwire_adjunct_files/1/370874-2.pdf)
Supplement: Supplementary file [file 370874-2.pdf]

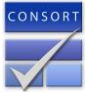

# Modified\* CONSORT 2010 checklist of information to include when reporting a randomised trial

| Section/Topic                    | Item No | Checklist item                                                                                                                                                                              | Reported on page No |
|----------------------------------|---------|---------------------------------------------------------------------------------------------------------------------------------------------------------------------------------------------|---------------------|
| <b>Title and abstract</b>        |         |                                                                                                                                                                                             |                     |
|                                  | 1a      | Identification as a randomised trial in the title                                                                                                                                           | p1                  |
|                                  | 1b      | Structured summary of trial design, methods, results, and conclusions (for specific guidance see CONSORT for abstracts)                                                                     | p4                  |
| <b>Introduction</b>              |         |                                                                                                                                                                                             |                     |
| Background and objectives        | 2a      | Scientific background and explanation of rationale                                                                                                                                          | p4                  |
|                                  | 2b      | Specific objectives or hypotheses                                                                                                                                                           | p4                  |
| <b>Methods</b>                   |         |                                                                                                                                                                                             |                     |
| Trial design                     | 3a      | Description of trial design (such as parallel, factorial) including allocation ratio                                                                                                        | p5                  |
|                                  | 3b      | Important changes to methods after trial commencement (such as eligibility criteria), with reasons                                                                                          | Not applicable      |
| Participants                     | 4a      | Eligibility criteria for <b>papers</b>                                                                                                                                                      | p5                  |
|                                  | 4b      | Settings and locations where the data were collected                                                                                                                                        | p8                  |
| Interventions                    | 5       | The interventions for each group with sufficient details to allow replication, including how and when they were actually administered                                                       | p5-6                |
| Outcomes                         | 6a      | Completely defined pre-specified primary and secondary outcome measures, including how and when they were assessed                                                                          | p6-7                |
|                                  | 6b      | Any changes to trial outcomes after the trial commenced, with reasons                                                                                                                       | p8                  |
| Sample size                      | 7a      | How sample size was determined                                                                                                                                                              | p7                  |
|                                  | 7b      | When applicable, explanation of any interim analyses and stopping guidelines                                                                                                                | Not applicable      |
| Randomisation:                   |         |                                                                                                                                                                                             |                     |
| Sequence generation              | 8a      | Method used to generate the random allocation sequence                                                                                                                                      | p5                  |
|                                  | 8b      | Type of randomisation; details of any restriction (such as blocking and block size)                                                                                                         | p5                  |
| Allocation concealment mechanism | 9       | Mechanism used to implement the random allocation sequence (such as sequentially numbered containers), describing any steps taken to conceal the sequence until interventions were assigned | p6                  |
| Implementation                   | 10      | Who generated the random allocation sequence, who <b>identified papers</b> , and who assigned <b>papers</b> to interventions                                                                | p6                  |
| Blinding                         | 11a     | If done, who was blinded after assignment to interventions and how                                                                                                                          | p6                  |

|                                                      |     |                                                                                                                                                                  |                                     |
|------------------------------------------------------|-----|------------------------------------------------------------------------------------------------------------------------------------------------------------------|-------------------------------------|
|                                                      | 11b | If relevant, description of the similarity of interventions                                                                                                      | Not applicable                      |
| Statistical methods                                  | 12a | Statistical methods used to compare groups for primary and secondary outcomes                                                                                    | p9                                  |
|                                                      | 12b | Methods for additional analyses, such as subgroup analyses and adjusted analyses                                                                                 | p9-10                               |
| <b>Results</b>                                       |     |                                                                                                                                                                  |                                     |
| Participant flow (a diagram is strongly recommended) | 13a | For each group, the numbers of <b>papers which</b> were randomly assigned, received <b>the intended intervention</b> , and were analysed for the primary outcome | p10; p18<br>Flowchart<br>(Figure 1) |
|                                                      | 13b | For each group, losses and exclusions after randomisation, together with reasons                                                                                 | p10; p18<br>Flowchart<br>(Figure 1) |
| Recruitment                                          | 14a | Dates defining the periods of recruitment and follow-up                                                                                                          | p5                                  |
|                                                      | 14b | Why the trial ended or was stopped                                                                                                                               | Not applicable                      |
| Baseline data                                        | 15  | A table showing <b>baseline characteristics</b> for each group                                                                                                   | p17                                 |
| Numbers analysed                                     | 16  | For each group, number of <b>papers</b> (denominator) included in each analysis and whether the analysis was by original assigned groups                         | p17                                 |
| Outcomes and estimation                              | 17a | For each primary and secondary outcome, results for each group, and the estimated effect size and its precision (such as 95% confidence interval)                | p20-24                              |
|                                                      | 17b | For binary outcomes, presentation of both absolute and relative effect sizes is recommended                                                                      | Not applicable                      |
| Ancillary analyses                                   | 18  | Results of any other analyses performed, including subgroup analyses and adjusted analyses, distinguishing pre-specified from exploratory                        | p25-26                              |
| Harms                                                | 19  | All important harms or unintended effects in each group (for specific guidance see CONSORT for harms)                                                            | Not applicable                      |
| <b>Discussion</b>                                    |     |                                                                                                                                                                  |                                     |
| Limitations                                          | 20  | Trial limitations, addressing sources of potential bias, imprecision, and, if relevant, multiplicity of analyses                                                 | p14                                 |
| Generalisability                                     | 21  | Generalisability (external validity, applicability) of the trial findings                                                                                        | p13                                 |
| Interpretation                                       | 22  | Interpretation consistent with results, balancing benefits and harms, and considering other relevant evidence                                                    | p13-14                              |
| <b>Other information</b>                             |     |                                                                                                                                                                  |                                     |
| Registration                                         | 23  | Registration number and name of trial registry                                                                                                                   | Not applicable                      |
| Protocol                                             | 24  | Where the full trial protocol can be accessed, if available                                                                                                      | p5                                  |
| Funding                                              | 25  | Sources of funding and other support (such as supply of drugs), role of funders                                                                                  | p15                                 |

\*We modified the CONSORT checklist (amendments in red) to apply to our RCT in publishing where manuscripts were randomised to the intervention and control groups.
